# Supplementary material for: Dissection of Resistance Genes to Pseudomonas syringae pv. phaseolicola in UI3 Common Bean Cultivar
Source: MDPI journal article supplement (doi:10.3390/ijms18122503), 2017-11-23
Supplement: s1 [file s1]

**Table S1.** Phenotypic correlation coefficients between resistance traits to halo blight races 1, 5, 7 and 9 in the UI3A52 and UI3T F<sub>2</sub> populations (above and below the diagonal, respectively).

| Trait <sup>a</sup> | Race 1  |        |      |        |       | Race 5 |         |      |        |       | Race 7 |         |        |      |        | Race 9 |      |        |         |      |        |       |
|--------------------|---------|--------|------|--------|-------|--------|---------|------|--------|-------|--------|---------|--------|------|--------|--------|------|--------|---------|------|--------|-------|
|                    | PLAUDPC | PLAREA | PDC  | PAUDPC | PAREA | PLDC   | PLAUDPC | PDC  | PAUDPC | PAREA | PLDC   | PLAUDPC | PLAREA | PDC  | PAUDPC | PAREA  | PLDC | PLAREA | PLAUDPC | PDC  | PAUDPC | PAREA |
| Race 1             | PLDC    | 0.96   | 0.63 | 0.32   | 0.35  |        |         |      |        |       | 0.84   | 0.84    |        | 0.39 | 0.39   |        |      |        |         | 0.38 | 0.41   |       |
|                    | PLAUDPC |        |      | 0.65   | 0.35  | 0.37   |         |      |        |       | 0.86   | 0.85    |        | 0.42 | 0.43   | 0.28   |      |        |         | 0.42 | 0.44   | 0.29  |
|                    | PLAREA  |        |      |        |       | 0.26   |         |      |        |       | 0.54   | 0.52    |        | 0.35 | 0.31   |        |      |        |         | 0.25 | 0.25   |       |
|                    | PDC     |        |      |        |       | 0.98   | 0.62    |      |        |       | 0.32   | 0.29    | 0.38   | 0.89 | 0.87   | 0.57   |      |        |         | 0.89 | 0.86   | 0.65  |
|                    | PAUDPC  |        |      |        | 0.96  |        | 0.64    |      |        |       | 0.36   | 0.33    | 0.39   | 0.87 | 0.87   | 0.53   |      |        |         | 0.88 | 0.85   | 0.62  |
|                    | PAREA   |        |      |        | 0.63  |        |         |      |        |       |        |         | 0.48   | 0.62 | 0.60   | 0.60   |      |        |         | 0.62 | 0.53   | 0.52  |
| Race 5             | PLDC    |        |      |        |       |        |         |      |        |       |        |         |        |      |        |        |      |        |         |      |        |       |
|                    | PLAUDPC |        |      |        |       | 0.99   |         |      |        |       |        |         |        |      |        |        |      |        |         |      |        |       |
|                    | PDC     |        |      |        | 0.93  | 0.87   | 0.78    |      |        |       |        |         |        |      |        |        |      |        |         |      |        |       |
|                    | PAUDPC  |        |      |        | 0.96  | 0.90   | 0.74    |      |        | 0.99  |        |         |        |      |        |        |      |        |         |      |        |       |
|                    | PAREA   |        |      |        | 0.78  | 0.63   | 0.73    |      |        | 0.81  | 0.83   |         |        |      |        |        |      |        |         |      |        |       |
| Race 7             | PLDC    |        |      |        |       |        |         |      |        |       |        | 0.99    |        | 0.41 | 0.43   | 0.26   |      |        |         | 0.41 | 0.42   | 0.32  |
|                    | PLAUDPC |        |      |        |       |        |         |      |        |       |        |         |        | 0.38 | 0.39   | 0.25   |      |        |         | 0.39 | 0.4    | 0.30  |
|                    | PLAREA  |        |      |        |       |        |         |      |        |       |        |         |        | 0.31 | 0.29   | 0.41   |      |        |         | 0.40 | 0.33   | 0.40  |
|                    | PDC     |        |      |        |       | 0.78   |         |      | 0.62   |       |        |         |        |      | 0.99   | 0.63   |      |        |         | 0.88 | 0.87   | 0.65  |
|                    | PAUDPC  |        |      |        |       | 0.81   |         |      | 0.68   | 0.61  |        |         |        | 0.99 |        | 0.61   |      |        |         | 0.88 | 0.87   | 0.63  |
|                    | PAREA   |        |      |        |       |        |         |      |        |       |        |         |        |      |        |        |      |        |         | 0.61 | 0.58   | 0.75  |
| Race 9             | PLDC    |        |      |        |       | 0.99   | 0.98    |      |        |       |        |         |        |      |        | 0.63   |      |        |         |      |        |       |
|                    | PLAUDPC |        |      |        |       | 0.99   | 0.98    |      |        |       |        |         |        |      |        | 0.63   |      |        |         |      |        |       |
|                    | PLAREA  |        |      |        |       | 0.67   | 0.72    |      |        |       |        |         |        |      |        |        |      |        |         |      |        |       |
|                    | PDC     |        |      |        | 0.87  | 0.81   | 0.78    |      |        | 0.91  | 0.92   | 0.84    |        |      | 0.65   | 0.66   |      |        |         |      | 0.96   | 0.71  |
|                    | PAUDPC  |        |      |        | 0.94  | 0.88   | 0.70    |      |        | 0.93  | 0.96   | 0.86    |        |      |        |        |      |        |         | 0.98 |        | 0.70  |
|                    | PAREA   |        |      |        |       | 0.62   |         | 0.68 | 0.68   | 0.65  | 0.66   | 0.74    |        |      |        | 0.67   | 0.69 | 0.70   | 0.72    | 0.69 |        |       |

<sup>1</sup>Correlations significant at  $P \leq 0.05$  are shown. UI3T = races 1, 5, 7 and 9 were evaluated in pod; races 5 and 9 were evaluated in primary leaf. UI3A52 = races 1, 7 and 9 were evaluated in pod; races 1 and 7 were evaluated in primary leaf. PDC = pod disease score, PAUDPC = pod area under the disease progress curve, PAREA = size of the lesion on pods, PLDC = primary leaf disease score, PLAUDPC = primary leaf area under the disease progress curve, PLAREA = size of the lesion on primary leaves.

**Table S2.** Distribution of molecular markers on the linkage map constructed from the F<sub>2</sub> UI3T population.

| LG           | Map length<br>(cM) | N° markers | Marker density<br>(cM/marker) | Marker types     |            |                  |                  |                  |                  |
|--------------|--------------------|------------|-------------------------------|------------------|------------|------------------|------------------|------------------|------------------|
|              |                    |            |                               | SSR <sup>a</sup> | <i>Fin</i> | PFC <sup>b</sup> | <i>Pse-race1</i> | <i>Pse-race5</i> | <i>Pse-race7</i> |
| 1            | 40.45              | 7          | 5.8                           | 6                | 1          |                  |                  |                  |                  |
| 2            | 97.82              | 11         | 8.9                           | 11               |            |                  |                  |                  |                  |
| 3            | 86.93              | 12         | 7.2                           | 12               |            |                  |                  |                  |                  |
| 4            | 38.24              | 5          | 7.7                           | 5                |            |                  |                  |                  |                  |
| 5            | 45.56              | 5          | 9.1                           | 5                |            |                  |                  |                  |                  |
| 6            | 126.28             | 11         | 11.5                          | 10               |            | 1                |                  |                  |                  |
| 7            | 10.91              | 2          | 5.5                           | 2                |            |                  |                  |                  |                  |
| 8            | 79.76              | 10         | 8.0                           | 10               |            |                  |                  |                  |                  |
| 9            | 113.64             | 13         | 8.7                           | 13               |            |                  |                  |                  |                  |
| 10           | 48.80              | 10         | 4.9                           | 7                |            |                  | 1                | 1                | 1                |
| 11           | 62.42              | 5          | 12.5                          | 5                |            |                  |                  |                  |                  |
| <b>Total</b> | 750.81             | 91         | 89.8                          | 86               | 1          | 1                | 1                | 1                | 1                |

<sup>a</sup>SSR: Simple sequence repeat. <sup>b</sup>PFC: flower colour marker.

**Table S3.** Distribution of molecular markers on the linkage map constructed from the F<sub>2</sub> UI3A52 population.

| LG           | Map length<br>(cM) | N° markers | Marker density<br>(cM/marker) | Marker types     |            |                  |                  |                  |
|--------------|--------------------|------------|-------------------------------|------------------|------------|------------------|------------------|------------------|
|              |                    |            |                               | SSR <sup>a</sup> | <i>Fin</i> | PFC <sup>b</sup> | <i>Pse-race1</i> | <i>Pse-race7</i> |
| 1            | 45.92              | 5          | 9.2                           | 4                | 1          |                  |                  |                  |
| 2            | 92.62              | 15         | 6.2                           | 15               |            |                  |                  |                  |
| 3            | 50.90              | 12         | 4.2                           | 12               |            |                  |                  |                  |
| 4            | 84.40              | 9          | 9.4                           | 9                |            |                  |                  |                  |
| 5            | 51.55              | 4          | 12.9                          | 4                |            |                  |                  |                  |
| 6            | 91.83              | 12         | 7.7                           | 11               |            | 1                |                  |                  |
| 7            | 41.12              | 3          | 13.7                          | 3                |            |                  |                  |                  |
| 8            | 65.85              | 8          | 8.2                           | 8                |            |                  |                  |                  |
| 9            | 87.20              | 14         | 6.2                           | 14               |            |                  |                  |                  |
| 10           | 45.45              | 10         | 4.5                           | 8                |            |                  | 1                | 1                |
| 11           | 69.75              | 7          | 10.0                          | 7                |            |                  |                  |                  |
| <b>Total</b> | 726.59             | 99         | 92.2                          | 95               | 1          | 1                | 1                | 1                |

<sup>a</sup>SSR: Simple sequence repeat. <sup>b</sup>PFC: flower colour marker.

**Table S4.** The annotated potential candidate genes identified on QTL intervals, their chromosome (Chr) location (start and end), the putative predicted function resulting from Phytozome and TAIR functional annotations and their homologs in Arabidopsis.

| Gene Name               | Chromosome | Gene Start...End (bp) | Description Pytozome                    | Arabidopsis Homolog | Description TAIR                                           |
|-------------------------|------------|-----------------------|-----------------------------------------|---------------------|------------------------------------------------------------|
| <i>PhnuL008G.09500</i>  | Chr08      | 10319464...10323106   | Flavonol synthase                       | AT5G05600           | Encodes a protein with similarity to flavonol synthases    |
| <i>PhnuL008G.02600</i>  | Chr08      | 10505620...10509420   | Serine/Threonine protein kinase         | AT5G02290           | Protein kinase NAK                                         |
| <i>PhnuL008G.099001</i> | Chr08      | 10681885...10685563   | Esterase                                | AT3G11210           | SGNH hydrolase-type esterase protein                       |
| <i>PhnuL008G.03900</i>  | Chr08      | 11325850...11327848   | Glucosyl transferase                    | AT4G34131           | UDP-glucosyl transferase 7383                              |
| <i>PhnuL008G.04900</i>  | Chr08      | 11539614...11542822   | Zinc finger C3HC4 type                  | AT5G01520           | RING/U-box protein                                         |
| <i>PhnuL008G.05300</i>  | Chr08      | 11594807...11609778   | Serine/Threonine protein kinase         | AT3G09010           | Protein kinase                                             |
| <i>PhnuL008G.05600</i>  | Chr08      | 11643663...11646782   | NL-like protein                         | AT3G47570           | Leucine-rich repeat protein kinase protein                 |
| <i>PhnuL008G.05700</i>  | Chr08      | 11650196...11651706   | Galactosyl transferase                  | AT2G38150           | 1,4-galactosyltransferase protein                          |
| <i>PhnuL008G.05700</i>  | Chr08      | 11661123...11665557   | Pentatricopeptide repeat family (PPR)   | AT2G42810           | Tetatricopeptide repeat (TPR)-like protein                 |
| <i>PhnuL008G.06400</i>  | Chr08      | 11726822...11728705   | Aquaporin                               | AT4G00430           | Plasma membrane intrinsic protein                          |
| <i>PhnuL008G.06500</i>  | Chr08      | 11754183...11757722   | NL-like protein                         | AT4G08850           | Leucine-rich repeat receptor-like protein                  |
| <i>PhnuL008G.06700</i>  | Chr08      | 11833930...11837425   | Serine/Threonine protein kinase         | AT4G08850           | Leucine-rich repeat receptor-like protein                  |
| <i>PhnuL008G.07400</i>  | Chr08      | 11938397...11941731   | Glycerol transferase                    | AT2G38110           | Glycerol-3-phosphate acyltransferase 6                     |
| <i>PhnuL008G.07400</i>  | Chr08      | 11938397...11941731   | Pentatricopeptide repeat family (PPR)   | AT3G09060           | Pentatricopeptide repeat (PPR) protein                     |
| <i>PhnuL008G.08400</i>  | Chr08      | 12155232...12159861   | NL-like protein                         | AT1G74710           | Receptor like protein 13                                   |
| <i>PhnuL008G.08500</i>  | Chr08      | 12177794...12182886   | NL-like protein                         | AT1G74710           | Receptor like protein 13                                   |
| <i>PhnuL008G.09000</i>  | Chr08      | 12247176...12250708   | Pectinase                               | AT1G58190           | Receptor like protein 9                                    |
| <i>PhnuL008G.09100</i>  | Chr08      | 12255903...12260296   | Serine/Threonine protein kinase         | AT1G74190           | Receptor like protein 15                                   |
| <i>PhnuL008G.09200</i>  | Chr08      | 12298571...12300950   | Pectinase                               | AT1G58190           | Receptor like protein 9                                    |
| <i>PhnuL008G.09300</i>  | Chr08      | 12306228...12312218   | NL-like protein                         | AT1G74180           | Receptor like protein 14                                   |
| <i>PhnuL008G.09600</i>  | Chr08      | 12386198...12388610   | NL-like protein                         | AT1G74180           | Receptor like protein 14                                   |
| <i>PhnuL008G.11100</i>  | Chr08      | 12599137...12601627   | Zinc finger C3HC4 type                  | AT5G38580           | E3 ligase involved in membrane trafficking and salt stress |
| <i>PhnuL008G.11600</i>  | Chr08      | 12695718...12699577   | NL-like protein                         | AT5G49290           | Receptor like protein 56                                   |
| <i>PhnuL008G.11700</i>  | Chr08      | 12704332...12705929   | Pectinase                               | AT1G58190           | Receptor like protein 9                                    |
| <i>PhnuL008G.11800</i>  | Chr08      | 12731112...12735272   | NL-like protein                         | AT1G58190           | Receptor like protein 9                                    |
| <i>PhnuL008G.12400</i>  | Chr08      | 12920518...12926327   | Zinc finger C3HC4 type                  | AT5G05830           | RING/FYVE/PHD zinc finger protein                          |
| <i>PhnuL008G.12500</i>  | Chr08      | 13219256...13220618   | Universal stress protein                | AT5G03990           | ATLUP, UNIVERSAL STRESS PROTEIN                            |
| <i>PhnuL008G.13600</i>  | Chr08      | 13221659...13223083   | Glutathione transferase                 | AT3G09270           | ATGSTU8, GLUTATHIONE S-TRANSFERASE TAU 8                   |
| <i>PhnuL008G.13700</i>  | Chr08      | 13237819...13238946   | Glutathione transferase                 | AT3G09270           | ATGSTU8, GLUTATHIONE S-TRANSFERASE TAU 8                   |
| <i>PhnuL008G.14300</i>  | Chr08      | 13258029...13259010   | Lipid transfer protein (LTP)            | AT3G03980           | Bifunctional inhibitor/lipid-transfer protein              |
| <i>PhnuL008G.15500</i>  | Chr08      | 13661070...13663788   | Serine/Threonine protein kinase         | AT5G02070           | Protein kinase protein                                     |
| <i>PhnuL008G.15700</i>  | Chr08      | 1377513...13783413    | Serine/Threonine protein kinase         | AT2G31280           | LHW-like protein                                           |
| <i>PhnuL008G.17100</i>  | Chr08      | 14441681...14443499   | Lipase                                  | AT5G44180           | Myzus persicae-induced lipase 1                            |
| <i>PhnuL008G.18200</i>  | Chr08      | 14476637...14478004   | Pathogenesis related Thaumatin (PRTLTP) | AT5G02140           | Pathogenesis-related thaumatin protein                     |
| <i>PhnuL008G.18300</i>  | Chr08      | 14495367...14495922   | Oxidoreductase                          | AT3G21420           | LATERAL BRANCHING OXIDOREDUCTASE L1, LBO1                  |
| <i>PhnuL008G.18500</i>  | Chr08      | 14548063...14551199   | Serine/Threonine protein kinase         | AT3G47110           | Leucine-rich repeat protein kinase protein                 |
| <i>PhnuL008G.18600</i>  | Chr08      | 14575781...14577231   | Zinc finger C3HC4 type                  | AT3G46620           | ABA- and drought-induced RING-DUF1117 gene                 |
| <i>PhnuL008G.19400</i>  | Chr08      | 14740208...14743225   | WRKY TF                                 | AT5G43290           | WRKY DNA-binding protein 49                                |
| <i>PhnuL008G.01600</i>  | Chr08      | 15405866...15411823   | Pentatricopeptide repeat family (PPR)   | AT5G65560           | Pentatricopeptide repeat (PPR) protein                     |
| <i>PhnuL008G.01200</i>  | Chr08      | 15435624...15438255   | Pentatricopeptide repeat family (PPR)   | AT5G16420           | Pentatricopeptide repeat (PPR-like) protein                |
| <i>PhnuL008G.099300</i> | Chr08      | 16248222...16249847   | Zinc finger C3HC4 type                  | AT5G02060           | Dot-type zinc finger DNA-binding protein                   |
| <i>PhnuL008G.12400</i>  | Chr08      | 16271031...16271907   | Zinc finger C3HC4 type                  | AT2G37580           | RING/U-box superfamily protein                             |
| <i>PhnuL008G.12400</i>  | Chr08      | 16608575...16610205   | NL-like protein                         | AT4G10400           | F-box/RNI-like/FBD-like domains-containing protein         |
| <i>PhnuL008G.124300</i> | Chr08      | 16672270...16675230   | NL-like protein                         | AT2G19130           | S-locus lectin protein kinase family protein               |
| <i>PhnuL008G.12400</i>  | Chr08      | 16755582...16757827   | Serine/Threonine protein kinase         | AT3G07070           | Protein kinase superfamily protein                         |
| <i>PhnuL008G.122700</i> | Chr08      | 17085291...17103461   | Serine/Threonine protein kinase         | AT3G24715           | Protein in kinase protein with octicosapeptide/Phox/Bem1p  |
| <i>PhnuL008G.122400</i> | Chr08      | 17352547...17355788   | Serine/Threonine protein kinase         | AT3G24660           | Transmembrane kinase-like 1                                |
| <i>PhnuL008G.122200</i> | Chr08      | 17397673...17401925   | Serine/Threonine protein kinase         | AT5G48940           | Leucine-rich repeat transmembrane protein in kinase        |
| <i>PhnuL008G.127537</i> | Chr08      | 18554390...18555807   | Lipase                                  | AT2G15230           | Lipase 1                                                   |
| <i>PhnuL008G.126700</i> | Chr08      | 18742319...18746922   | Pentatricopeptide repeat family (PPR)   | AT5G48730           | Pentatricopeptide repeat (PPR) protein                     |
| <i>PhnuL008G.124900</i> | Chr08      | 19421181...19423526   | NL-like protein                         | AT4G00340           | Receptor-like protein in kinase 4                          |
| <i>PhnuL008G.124800</i> | Chr08      | 19448115...19450586   | NL-like protein                         | AT2G19130           | S-locus lectin protein kinase protein                      |
| <i>PhnuL008G.124500</i> | Chr08      | 19803079...19804421   | NL-like protein                         | AT4G26340           | F-box/RNI-like/FBD-like domains-containing protein         |
| <i>PhnuL008G.128400</i> | Chr08      | 20659106...20661492   | Zinc finger C3HC4 type                  | AT3G07120           | RING/U-box protein                                         |
| <i>PhnuL008G.129100</i> | Chr08      | 20795642...20799197   | Glucosyl transferase                    | AT4G13090           | Xyloglucan endotransglucosylase/hydrolase 2                |
| <i>PhnuL008G.129800</i> | Chr08      | 20990182...20992380   | NL-like protein                         | AT5G22660           | FBD, F-box, Skp2-like and Leucine Rich Repeat protein      |
| <i>PhnuL008G.129900</i> | Chr08      | 21029894...21032325   | Glucosyl transferase                    | AT4G13090           | Xyloglucan endotransglucosylase/hydrolase 2                |
| <i>PhnuL008G.130600</i> | Chr08      | 21193569...21195702   | RPM1-interacting protein 4 (RIN4)       | AT3G25070           | RPM1 interacting protein 4                                 |
| <i>PhnuL008G.130800</i> | Chr08      | 21212388...21217383   | Esterase                                | AT3G25110           | Fata acyl-ACP thioesterase                                 |
| <i>PhnuL008G.132200</i> | Chr08      | 21617510...21620576   | Galacturonosyl transferase              | AT3G25110           | Fata acyl-ACP thioesterase                                 |
| <i>PhnuL008G.133000</i> | Chr08      | 22089795...22092762   | Galactosyl transferase                  | AT1G05170           | Galactosyltransferase protein                              |
| <i>PhnuL008G.134100</i> | Chr08      | 22468880...22470560   | Oxidoreductase                          | AT3G19000           | 2-oxoglutarate (2OG) and Fe(II)-dependent oxygenase        |
| <i>PhnuL008G.134600</i> | Chr08      | 22643571...22647976   | Pentatricopeptide repeat family (PPR)   | AT1G74600           | Pentatricopeptide repeat (PPR) protein                     |
| <i>PhnuL008G.137100</i> | Chr08      | 27792568...27793248   | Lipid transfer protein (LTP)            | AT5G48490           | Bifunctional inhibitor/lipid-transfer protein/seed storage |
| <i>PhnuL008G.139200</i> | Chr08      | 29375892...29378417   | Serine/Threonine protein kinase         | AT2G32800           | Protein in kinase                                          |

**Table S4.** Continued.

| Gene Name               | Chromosome | Gene Start...End (bp) | Description Phytozome                                  | Arabidopsis Homolog | Description TAIR                                                              |
|-------------------------|------------|-----------------------|--------------------------------------------------------|---------------------|-------------------------------------------------------------------------------|
| <i>Phvud.010G001300</i> | Chr10      | 1289816...1293978     | Glucosyl Transferase                                   | <i>AT1G22340</i>    | UDP-glucosyl transferase 85A7                                                 |
| <i>Phvud.010G001400</i> | Chr10      | 401790...407040       | Adenosyl-Methionine-dependent Methyltransferase        | <i>AT5G01470</i>    | S-adenosyl-L-methionine-dependent methyltransferases protein                  |
| <i>Phvud.010G002000</i> | Chr10      | 453307...457549       | Zinc finger C3HC4 type                                 | <i>AT5G01520</i>    | RING/U-box protein                                                            |
| <i>Phvud.010G002300</i> | Chr10      | 482796...483181       | Defensin-like protein (DEFL)                           | <i>AT4G29273</i>    | low-molecular-weight cysteine-rich 23                                         |
| <i>Phvud.010G002400</i> | Chr10      | 488355...488692       | Defensin-like protein (DEFL)                           | <i>AT4G29273</i>    | low-molecular-weight cysteine-rich 23                                         |
| <i>Phvud.010G002900</i> | Chr10      | 533958...537310       | Glucan glucosidase                                     | <i>AT5G01260</i>    | Carbohydrate-binding-like fold                                                |
| <i>Phvud.010G003100</i> | Chr10      | 552374...553612       | lactosyl ceramide galactosyl transferase               | <i>AT2G38150</i>    | Alpha 1,4-glycosyltransferase family protein                                  |
| <i>Phvud.010G004650</i> | Chr10      | 719323...722383       | Glycerol-3-phosphate 2-O-acyltransferase               | <i>AT2G38110</i>    | Glycerol-3-phosphate acyltransferase 6                                        |
| <i>Phvud.010G005300</i> | Chr10      | 818028...824698       | Zinc finger C3HC4 type                                 | <i>AT5G05830</i>    | RING/FYVE/PHD zinc finger protein                                             |
| <i>Phvud.010G005500</i> | Chr10      | 849926...851704       | Lipid transferase                                      | <i>AT5G05960</i>    | Bifunctional inhibitor/lipid-transfer protein/seed storage 2S albumin protein |
| <i>Phvud.010G005800</i> | Chr10      | 875154...878597       | Lipase LTL1                                            | <i>AT5G33370</i>    | GDSL-like Lipase/Acylhydrolase protein                                        |
| <i>Phvud.010G008700</i> | Chr10      | 1236830...1248545     | TIR-NL protein                                         | <i>AT5G36930</i>    | Disease resistance protein (TIR-NBS-LRR class)                                |
| <i>Phvud.010G008900</i> | Chr10      | 1268630...1271183     | Universal stress protein family                        | <i>AT3G53990</i>    | Adenine nucleotide alpha hydrolases-like protein                              |
| <i>Phvud.010G009000</i> | Chr10      | 1282831...1287667     | Glucosyl Transferase                                   | <i>AT1G22340</i>    | UDP-glucosyl transferase 85A7                                                 |
| <i>Phvud.010G010300</i> | Chr10      | 1480675...1484047     | Serine/Threonine protein kinase                        | <i>AT2G28930</i>    | Protein kinase 1B                                                             |
| <i>Phvud.010G011400</i> | Chr10      | 1622170...1628245     | Serine/Threonine protein kinase                        | <i>AT2G22970</i>    | Serine carboxypeptidase-like 11                                               |
| <i>Phvud.010G012700</i> | Chr10      | 2089803...2092764     | Steroid 17alpha-monoxygenase                           | <i>AT2G45570</i>    | Cytochrome P450, family 76, subfamily C, polypeptide 2                        |
| <i>Phvud.010G012800</i> | Chr10      | 2063963...2073914     | ABC Transporter Family member                          | <i>AT3G62150</i>    | P-glycoprotein 21                                                             |
| <i>Phvud.010G012900</i> | Chr10      | 2037888...2039846     | Isoflavone 2'-hydroxylase / Isoflavone 2'-monoxygenase | <i>AT4G37370</i>    | Cytochrome P450, family 81, subfamily D, polypeptide 8                        |
| <i>Phvud.010G013000</i> | Chr10      | 2027857...2029737     | Isoflavone 2'-hydroxylase / Isoflavone 2'-monoxygenase | <i>AT4G37370</i>    | Cytochrome P450, family 81, subfamily D, polypeptide 8                        |
| <i>Phvud.010G013100</i> | Chr10      | 2020026...2021761     | Isoflavone 2'-hydroxylase / Isoflavone 2'-monoxygenase | <i>AT4G37370</i>    | Cytochrome P450, family 81, subfamily D, polypeptide 8                        |
| <i>Phvud.010G013600</i> | Chr10      | 1903841...1907125     | NL-like protein                                        | <i>AT1G45616</i>    | Receptor like protein 6                                                       |
| <i>Phvud.010G013700</i> | Chr10      | 1892124...1895918     | NL-like protein                                        | <i>AT1G45616</i>    | Receptor like protein 6                                                       |
| <i>Phvud.010G013800</i> | Chr10      | 1821464...1855683     | Sterol Glucosyl Transferase                            | <i>AT3G07020</i>    | UDP-Glycosyltransferase protein                                               |
| <i>Phvud.010G014000</i> | Chr10      | 1807165...1814966     | Glycosyl transferase                                   | <i>AT2G37585</i>    | Core-2/1-branching beta-1,6-N-acetylglucosaminyltransferase protein           |
| <i>Phvud.010G014101</i> | Chr10      | 1920411...1922933     | NL-like protein                                        | <i>AT1G45616</i>    | Receptor like protein 6                                                       |
| <i>Phvud.010G015100</i> | Chr10      | 2253323...2267345     | Serine/Threonine protein kinase                        | <i>AT2G37840</i>    | Protein kinase protein                                                        |
| <i>Phvud.010G015400</i> | Chr10      | 2305856...2316848     | Glutamate-5-semialdehyde dehydrogenase                 | <i>AT2G39800</i>    | delta1-pyrroline-5-carboxylate synthase 1                                     |
| <i>Phvud.010G015900</i> | Chr10      | 2350908...2357176     | Oxidoreductase                                         | <i>AT3G19010</i>    | 2-oxoglutarate (2OG) and Fe(II)-dependent oxygenase protein                   |
| <i>Phvud.010G018000</i> | Chr10      | 2633076...2636748     | Polygalacturonase / Pectinase                          | <i>AT3G15720</i>    | Pectin lyase-like protein                                                     |
| <i>Phvud.010G018300</i> | Chr10      | 2658302...2665822     | NL-like protein                                        | <i>AT5G48740</i>    | Leucine-rich repeat protein kinase protein                                    |
| <i>Phvud.010G018400</i> | Chr10      | 2689239...2693034     | TIR-NL protein                                         | <i>AT5G36930</i>    | Disease resistance protein (TIR-NBS-LRR class)                                |
| <i>Phvud.010G019900</i> | Chr10      | 2884093...2885050     | Zinc finger C3HC4 type                                 | <i>AT3G25030</i>    | RING/U-box protein                                                            |
| <i>Phvud.010G021001</i> | Chr10      | 3006260...3010587     | Lipase 5                                               | <i>AT1G53920</i>    | GDSL-motif lipase 5                                                           |
| <i>Phvud.010G021200</i> | Chr10      | 3035922...3042052     | RPM1-interacting protein 4 (RIN4)                      | <i>AT3G25070</i>    | RPM1 interacting protein 4                                                    |
| <i>Phvud.010G023100</i> | Chr10      | 3272172...3280327     | NL-like protein                                        | <i>AT5G63020</i>    | Disease resistance protein (CC-NBS-LRR class)                                 |
| <i>Phvud.010G023200</i> | Chr10      | 3283510...3296126     | NL-like protein                                        | <i>AT1G12280</i>    | LRR and NB-ARC domains-containing disease resistance protein                  |
| <i>Phvud.010G023500</i> | Chr10      | 3306753...3310882     | NL-like protein                                        | <i>AT4G13020</i>    | Protein kinase protein                                                        |
| <i>Phvud.010G023600</i> | Chr10      | 3315963...3326616     | Serine/Threonine protein kinase                        | <i>AT4G13020</i>    | Protein kinase protein                                                        |
| <i>Phvud.010G023800</i> | Chr10      | 3351907...3357035     | Gycosyl Hydrolase                                      | <i>AT3G07320</i>    | O-Glycosyl hydrolases family 17 protein                                       |
| <i>Phvud.010G024000</i> | Chr10      | 3382255...3384686     | NL-like protein                                        | <i>AT5G36930</i>    | Disease resistance protein (TIR-NBS-LRR class)                                |
| <i>Phvud.010G024100</i> | Chr10      | 3388369...3391852     | TIR-NL protein                                         | <i>AT5G36930</i>    | Disease resistance protein (TIR-NBS-LRR class)                                |
| <i>Phvud.010G024250</i> | Chr10      | 3412387...3416106     | TIR-NL protein                                         | <i>AT5G36930</i>    | Disease resistance protein (TIR-NBS-LRR class)                                |
| <i>Phvud.010G024301</i> | Chr10      | 3434532...3438142     | TIR-NL protein                                         | <i>AT5G36930</i>    | Disease resistance protein (TIR-NBS-LRR class)                                |
| <i>Phvud.010G024351</i> | Chr10      | 3445959...3449123     | NL-like protein                                        | <i>AT5G36930</i>    | Disease resistance protein (TIR-NBS-LRR class)                                |
| <i>Phvud.010G024700</i> | Chr10      | 3484577...3492985     | Xyloglucan Glycosyl transferase                        | <i>AT3G07330</i>    | Cellulose-synthase-like C6                                                    |

**Table S4.** Continued.



| Gene Name      | Chromosome | Gene Start...End (bp) | Description Phytozoms                  | Arabidopsis Homolog | Description TAIR                                            |
|----------------|------------|-----------------------|----------------------------------------|---------------------|-------------------------------------------------------------|
| Pvul010G045300 | Chr10      | 695455...699456       | Pentatricopeptide repeat family (PTPR) | ATG02150            | Tetratricopeptide repeat (TPR)-like protein                 |
| Pvul010G045700 | Chr10      | 6990250...6992727     | Pentatricopeptide repeat family (PTPR) | ATUG1460            | Tetratricopeptide repeat (TPR)-like protein                 |
| Pvul010G045800 | Chr10      | 6996557...6999087     | Pentatricopeptide repeat family (PTPR) | ATUG08070           | Tetratricopeptide repeat (TPR)-like protein                 |
| Pvul010G046000 | Chr10      | 7006433...7010083     | Pentatricopeptide repeat family (PTPR) | ATUG33170           | Tetratricopeptide repeat (TPR)-like protein                 |
| Pvul010G046200 | Chr10      | 7033427...7036656     | Pentatricopeptide repeat family (PTPR) | ATUG15510           | Tetratricopeptide repeat (TPR)-like protein                 |
| Pvul010G046500 | Chr10      | 7159295...7165959     | WRKY TF                                | ATG44745            | WRKY transcription factor                                   |
| Pvul010G047800 | Chr10      | 744862...7447256      | Lipase                                 | ATG26260            | Phospholipase A 2A                                          |
| Pvul010G048300 | Chr10      | 72322924...7232542    | Pentatricopeptide repeat family (PTPR) | ATG32530            | Pentatricopeptide repeat (TPR) protein                      |
| Pvul010G048900 | Chr10      | 7616766...7663028     | Lipase                                 | ATG34810            | alpha/beta-Hydrolase protein                                |
| Pvul010G050000 | Chr10      | 7748995...7773515     | Serine/Threonine protein kinase        | ATG244830           | Protein kinase protein                                      |
| Pvul010G050200 | Chr10      | 7793087...7795080     | Zinc finger C3HC4 type                 | ATG219380           | RNA recognition motif (RRM)-containing protein              |
| Pvul010G050300 | Chr10      | 7847042...7847695     | Ethylene responsive TF                 | ATG244840           | Ethylene-responsive element binding factor 13               |
| Pvul010G050600 | Chr10      | 7874160...7874875     | Ethylene responsive TF                 | ATG244840           | Ethylene-responsive element binding factor 13               |
| Pvul010G050700 | Chr10      | 7910189...7910824     | Ethylene responsive TF                 | ATG244840           | Ethylene-responsive element binding factor 13               |
| Pvul010G050800 | Chr10      | 7914489...7915589     | Ethylene responsive TF                 | ATG244840           | Ethylene-responsive element binding factor 13               |
| Pvul010G051700 | Chr10      | 8027254...8027691     | Glucosaminyl transferase               | ATG32105            | Beta-1,3-N-Acetylglucosaminyltransferase protein            |
| Pvul010G052200 | Chr10      | 8066744...8071643     | NL-like protein                        | ATG34495            | Hemoglobin-leucine zipper protein 4                         |
| Pvul010G053300 | Chr10      | 8219823...8221642     | Glycosyl transferase                   | ATUG01070           | UDP-Glycosyltransferase protein                             |
| Pvul010G053700 | Chr10      | 8263334...8265065     | Glycosyl transferase                   | ATUG01070           | UDP-Glycosyltransferase protein                             |
| Pvul010G054000 | Chr10      | 8315153...8316384     | Ethylene responsive TF                 | ATG34490            | Integrase-type DNA-binding protein                          |
| Pvul010G054300 | Chr10      | 8409164...8410227     | NL-like protein                        | ATG36930            | Disease resistance protein (TIR-NBS-LRR class)              |
| Pvul010G054400 | Chr10      | 8413737...8415563     | NL-like protein                        | ATG66900            | Disease resistance protein (TIR-NBS-LRR class)              |
| Pvul010G054900 | Chr10      | 8426454...8429005     | NL-like protein                        | ATG17680            | Disease resistance protein (TIR-NBS-LRR class), putative    |
| Pvul010G054700 | Chr10      | 8437692...8435380     | NL-like protein                        | ATG17680            | Disease resistance protein (TIR-NBS-LRR class)              |
| Pvul010G055100 | Chr10      | 8512688...8516389     | NL-like protein                        | ATG17680            | Disease resistance protein (TIR-NBS-LRR class), putative    |
| Pvul010G055200 | Chr10      | 8600902...8606805     | NL-like protein                        | ATG17680            | Disease resistance protein (TIR-NBS-LRR class), putative    |
| Pvul010G055300 | Chr10      | 8665818...8668931     | TIR-NL protein                         | ATG17680            | Disease resistance protein (TIR-NBS-LRR class), putative    |
| Pvul010G055600 | Chr10      | 8824768...8827571     | Pentatricopeptide repeat family (PTPR) | ATG22860            | Disease resistance protein (TIR-NBS-LRR class)              |
| Pvul010G057000 | Chr10      | 9042493...9045581     | Serine/Threonine protein kinase        | ATG21930            | Tetratricopeptide repeat (TPR)-like protein                 |
| Pvul010G057200 | Chr10      | 9004360...9007411     | Serine/Threonine protein kinase        | ATG21930            | S-b locus lectin protein kinase protein                     |
| Pvul010G057300 | Chr10      | 9015723...9018613     | Serine/Threonine protein kinase        | ATG21930            | S-b locus lectin protein kinase protein                     |
| Pvul010G057500 | Chr10      | 9078880...9081697     | Serine/Threonine protein kinase        | ATG21930            | S-b locus lectin protein kinase protein                     |
| Pvul010G057600 | Chr10      | 9119023...9121966     | Serine/Threonine protein kinase        | ATG21930            | S-b locus lectin protein kinase protein                     |
| Pvul010G057900 | Chr10      | 917866...9149355      | WRKY TF                                | ATG36640            | WRKY DNA-binding protein 70                                 |
| Pvul010G058150 | Chr10      | 9178648...9190498     | Serine/Threonine protein kinase        | ATG501920           | Protein kinase protein                                      |
| Pvul010G060800 | Chr10      | 9503176...9505775     | Serine/Threonine protein kinase        | ATG501550           | Lectin receptor kinase a4.1                                 |
| Pvul010G061333 | Chr10      | 9858787...9857412     | NL-like protein                        | ATG16890            | Disease resistance protein (TIR-NBS-LRR class), putative    |
| Pvul010G062400 | Chr10      | 11021883...11026822   | NL-like protein                        | ATG501720           | RND-like superfamily protein                                |
| Pvul010G062500 | Chr10      | 11197346...11201046   | WRKY TF                                | ATG38470            | WRKY DNA-binding protein 33                                 |
| Pvul010G063000 | Chr10      | 11340502...11346267   | NL-like protein                        | ATG14470            | NB-ARC domain-containing disease resistance protein         |
| Pvul010G063100 | Chr10      | 11364027...11368326   | NL-like protein                        | ATG14470            | NB-ARC domain-containing disease resistance protein         |
| Pvul010G063700 | Chr10      | 11792600...11808472   | NL-like protein                        | ATG14470            | NB-ARC domain-containing disease resistance protein         |
| Pvul010G064300 | Chr10      | 1222615...12226616    | NL-like protein                        | ATG33170            | Indoleacetic acid receptor-like kinase 2                    |
| Pvul010G064700 | Chr10      | 12257527...12260383   | TIR-NL protein                         | ATG33170            | Indoleacetic acid receptor-like kinase 2                    |
| Pvul010G064800 | Chr10      | 12309957...12316026   | TIR-NL protein                         | ATG41750            | Disease resistance protein (TIR-NBS-LRR class)              |
| Pvul010G064900 | Chr10      | 12409800...12414655   | NL-like protein                        | ATG67150            | Leucine-rich repeat protein kinase protein                  |
| Pvul010G066600 | Chr10      | 32855403...32858889   | Peroxidase                             | ATG50340            | Peroxidase protein                                          |
| Pvul010G066700 | Chr10      | 19262794...19265022   | Peroxidase                             | ATG50340            | Peroxidase protein                                          |
| Pvul010G066700 | Chr10      | 19262794...19265022   | Peroxidase                             | ATG50340            | Peroxidase protein                                          |
| Pvul010G066900 | Chr10      | 14957070...14959781   | Peroxidase                             | ATG50340            | Peroxidase protein                                          |
| Pvul010G066900 | Chr10      | 14121133...14122639   | Serine/Threonine protein kinase        | ATG50340            | SCS3-interacting protein 1                                  |
| Pvul010G067600 | Chr10      | 20990610...20994291   | Serine/Threonine protein kinase        | ATG58380            | with no lysine (K) kinase 5                                 |
| Pvul010G067900 | Chr10      | 29571197...29576345   | Serine/Threonine protein kinase        | ATG51630            | Protein kinase protein                                      |
| Pvul010G068300 | Chr10      | 29966746...29973813   | Serine/Threonine protein kinase        | ATG501850           | Glycolipid transfer protein 1                               |
| Pvul010G068692 | Chr10      | 15261477...15267370   | Lipid transfer protein (LTP)           | ATG233470           | HS12-like 1                                                 |
| Pvul010G070200 | Chr10      | 30953527...30961609   | Zinc finger C3HC4 type                 | ATG32010            | Leucine-rich repeat protein kinase protein                  |
| Pvul010G070400 | Chr10      | 31287211...31290338   | NL-like protein                        | ATG56570            | C2H2-type zinc finger family protein                        |
| Pvul010G071100 | Chr10      | 31840220...31842480   | Zinc finger C3HC4 type                 | ATG02400            | C2H2-type zinc finger family protein                        |
| Pvul010G071300 | Chr10      | 31949277...31951593   | Zinc finger C3HC4 type                 | ATG6080             | Glycosyl hydrolase with C2H2-type zinc finger domain        |
| Pvul010G071500 | Chr10      | 31987135...31992290   | Zinc finger C3HC4 type                 | ATG6190             | Receptor like protein 6                                     |
| Pvul010G073300 | Chr10      | 16500398...16505167   | Peroxidase                             | ATG45616            | Peroxidase protein                                          |
| Pvul010G074100 | Chr10      | 19868917...19869329   | Serine/Threonine protein kinase        | ATG03540            | Protein kinase IB                                           |
| Pvul010G074300 | Chr10      | 19622641...19626126   | Glutathione transferase                | ATG28890            | Glutathione S-transferase TAU 8                             |
| Pvul010G074600 | Chr10      | 19605209...19606645   | Glutathione transferase                | ATG09270            | Glutathione S-transferase TAU 8                             |
| Pvul010G074700 | Chr10      | 28553623...28554138   | Glutathione transferase                | ATG09270            | Glutathione S-transferase TAU 8                             |
| Pvul010G074900 | Chr10      | 16794900...16979827   | Pentatricopeptide repeat family (PTPR) | ATG18520            | Pentatricopeptide repeat (TPR) protein                      |
| Pvul010G075300 | Chr10      | 28343715...28347915   | Pentatricopeptide repeat family (PTPR) | ATG54030            | Protein kinase protein with tetratricopeptide repeat domain |
| Pvul010G075400 | Chr10      | 28378018...28379158   | Glutathione transferase                | ATG09270            | Glutathione S-transferase TAU 8                             |
| Pvul010G076200 | Chr10      | 28037674...28041059   | Fatty acid desaturase                  | ATG05580            | Fatty acid desaturase 8                                     |
| Pvul010G076901 | Chr10      | 28584021...28584657   | ABC transporter family member          | ATG15520            | Phloretin drug resistance 12                                |
| Pvul010G077300 | Chr10      | 17403315...17404616   | Oxidoreductase                         | ATG15520            | 2-oxoglutarate (2OG) and Fe(II)-dependent oxygenase protein |
| Pvul010G077900 | Chr10      | 29351953...29354818   | CRR like protein                       | ATG36020            | Phosphatidylcholine transfer protein 8                      |
| Pvul010G080600 | Chr10      | 14425210...14425866   | Esterase                               | ATG00880            | Plant invertase/pectin methylesterase inhibitor protein     |
| Pvul010G080700 | Chr10      | 14437448...14438107   | Esterase                               | ATG00880            | Plant invertase/pectin methylesterase inhibitor protein     |
| Pvul010G081100 | Chr10      | 14516011...14518257   | Pentatricopeptide repeat family (PTPR) | ATG02750            | Tetratricopeptide repeat (TPR)-like protein                 |
| Pvul010G081200 | Chr10      | 14519345...14520220   | Lipase                                 | ATG35790            | Phospholipase D delta                                       |
| Pvul010G081900 | Chr10      | 22683268...22685718   | Pentatricopeptide repeat family (PTPR) | ATG22410            | SLOW GROWTH 1                                               |
| Pvul010G082400 | Chr10      | 22576447...22579476   | NL-like protein                        | ATG08860            | Leucine-rich repeat receptor-like protein kinase protein    |
| Pvul010G082800 | Chr10      | 2321606...23215697    | NL-like protein                        | ATG08860            | Leucine-rich repeat receptor-like protein kinase protein    |
| Pvul010G083100 | Chr10      | 23397181...23398293   | Zinc finger C3HC4 type                 | ATG37150            | RING/U-box protein                                          |
| Pvul010G083200 | Chr10      | 34943184...34943938   | Zinc finger C3HC4 type                 | ATG35070            | RING/U-box protein                                          |
| Pvul010G084000 | Chr10      | 24308342...24311754   | Zinc finger C3HC4 type                 | ATG01580            | Zinc finger (CCCH-type/C3HC4-type RING finger) protein      |
| Pvul010G086300 | Chr10      | 33162791...33164000   | Esterase                               | ATG45600            | Alpha/beta-Hydrolases superfamily protein                   |
| Pvul010G086600 | Chr10      | 33223272...33225200   | Serine/Threonine protein kinase        | ATG45600            | Protein kinase protein                                      |
| Pvul010G086700 | Chr10      | 33493179...33501898   | Galacturonosyl transferase             | ATG61130            | Galacturonosyltransferase 1                                 |
| Pvul010G088200 | Chr10      | 33784293...33794256   | Lysophospholipid acyltransferase 2     | ATG45670            | Calcineurin B subunit-related                               |
| Pvul010G088500 | Chr10      | 33837336...33840656   | NL-like protein                        | ATG45616            | Receptor like protein 6                                     |
| Pvul010G088600 | Chr10      | 33895412...33896416   | Zinc finger C3HC4 type                 | ATG47610            | RING/U-box protein                                          |
| Pvul010G088800 | Chr10      | 33900669...33904636   | Lipase                                 | ATG42010            | Phospholipase D beta 1                                      |
| Pvul010G088900 | Chr10      | 34007433...34017964   | Lipase                                 | ATG42010            | Phospholipase D beta 1                                      |
| Pvul010G091000 | Chr10      | 34475362...34492105   | NL-like protein                        | ATG2780             | NB-ARC domain-containing disease resistance protein         |
| Pvul010G091200 | Chr10      | 34504191...34515966   | NL-like protein                        | ATG2720             | NB-ARC domain-containing disease resistance protein         |
| Pvul010G091500 | Chr10      | 34613095...34624959   | NL-like protein                        | ATG2720             | NB-ARC domain-containing disease resistance protein         |
| Pvul010G091600 | Chr10      | 34713367...34715677   | NL-like protein                        | ATG2720             | NB-ARC domain-containing disease resistance protein         |
| Pvul010G091800 | Chr10      | 34744680...34749984   | NL-like protein                        | ATG2720             | NB-ARC domain-containing disease resistance protein         |
| Pvul010G091900 | Chr10      | 35306140...35310341   | NL-like protein                        | ATG2720             | NB-ARC domain-containing disease resistance protein         |
| Pvul010G092400 | Chr10      | 35444535...35445330   | Glucosyl transferase                   | ATG4490             | Xyloglucan endo-transglycosylase-related 8                  |
| Pvul010G092500 | Chr10      | 35448547...35449788   | Zinc finger C3HC4 type                 | ATG4060             | RING/U-box protein                                          |
| Pvul010G093000 | Chr10      | 35170241...35171749   | Pentatricopeptide repeat family (PTPR) | ATG36730            | Pentatricopeptide repeat (TPR) protein                      |
| Pvul010G093100 | Chr10      | 35179332...35182651   | NL-like protein                        | ATG3890             | RAP                                                         |
| Pvul010G093200 | Chr10      | 35202013...35204462   | Pentatricopeptide repeat family (PTPR) | ATG3890             | Pentatricopeptide repeat (TPR) protein                      |
| Pvul010G093700 | Chr10      | 35683732...35686441   | Esterase                               | ATG61200            | Thioesterase protein                                        |
| Pvul010G095100 | Chr10      | 35849633...35851405   | Cellulase                              | ATG26130            | Cellulase (glycosyl hydrolase family 5) protein             |

**Table S4.** Continued.

| Gene Name               | Chromosome | Gene Start...End (bp) | Description Phytozone                                    | Arabidopsis Homolog | Description TAIR                                            |
|-------------------------|------------|-----------------------|----------------------------------------------------------|---------------------|-------------------------------------------------------------|
| <i>Phvul.010G098200</i> | Chr10      | 36365007...36376239   | Esterase                                                 | <i>AT1G01710</i>    | Acyl-CoA thioesterase family protein                        |
| <i>Phvul.010G098400</i> | Chr10      | 36393060...36394219   | Oxidoreductase                                           | <i>AT4G23340</i>    | 2-oxoglutarate (2OG) and Fe(II)-dependent oxygenase protein |
| <i>Phvul.010G099700</i> | Chr10      | 36675257...36679613   | Glycerol transferase                                     | <i>AT1G01610</i>    | Glycerol-3-phosphate acyltransferase 4                      |
| <i>Phvul.010G100400</i> | Chr10      | 36793713...36796196   | Serine/Threonine protein kinase                          | <i>AT4G00340</i>    | RLK4                                                        |
| <i>Phvul.010G100500</i> | Chr10      | 36801234...36804309   | Zinc finger C3HC4 type                                   | <i>AT4G00335</i>    | RING-H2 finger B1A                                          |
| <i>Phvul.010G100600</i> | Chr10      | 36814429...36816452   | Pentatricopeptide repeat family (PPR)                    | <i>AT2G46050</i>    | Pentatricopeptide repeat (PPR-like) protein                 |
| <i>Phvul.010G101100</i> | Chr10      | 36971142...36973192   | Zinc finger C3HC4 type                                   | <i>AT3G61460</i>    | Brassinosteroid-responsive RING-H2                          |
| <i>Phvul.010G101600</i> | Chr10      | 37068692...37070667   | Glucosyl transferase                                     | <i>AT4G34131</i>    | UDP-glucosyl transferase 73B3                               |
| <i>Phvul.010G101800</i> | Chr10      | 37085644...37087392   | Glucosyl transferase                                     | <i>AT4G34138</i>    | UDP-glucosyl transferase 73B1                               |
| <i>Phvul.010G103100</i> | Chr10      | 37208438...37212085   | Lipase                                                   | <i>AT1G01540</i>    | Protein kinase protein                                      |
| <i>Phvul.010G104200</i> | Chr10      | 37414116...37415803   | WRKY TF                                                  | <i>AT4G01250</i>    | WRKY TF                                                     |
| <i>Phvul.010G104300</i> | Chr10      | 37472766...37482584   | NL-like protein                                          | <i>AT4G27190</i>    | NB-ARC domain-containing disease resistance protein         |
| <i>Phvul.010G104700</i> | Chr10      | 37598402...37599637   | WRKY TF                                                  | <i>AT1G64000</i>    | WRKY DNA-binding protein 56                                 |
| <i>Phvul.010G105200</i> | Chr10      | 37619151...37619723   | Zinc finger C3HC4 type                                   | <i>AT3G61550</i>    | RING/U-box protein                                          |
| <i>Phvul.010G105900</i> | Chr10      | 37677298...37683724   | Glycosyl transferase                                     | <i>AT4G01210</i>    | Glycosyl transferase                                        |
| <i>Phvul.010G108000</i> | Chr10      | 38056509...38057171   | Lipase                                                   | <i>AT1G17420</i>    | Lipoxygenase 3                                              |
| <i>Phvul.010G108700</i> | Chr10      | 38146639...38149457   | Zinc finger C3HC4 type                                   | <i>AT4G01130</i>    | GD5L-like Lipase/Acylhydrolase superfamily protein          |
| <i>Phvul.010G110500</i> | Chr10      | 38414889...38418585   | Natural Resistance Associated Macrophage protein (NRAMP) | <i>AT1G47240</i>    | NRAMP metal ion transporter 2                               |
| <i>Phvul.010G110600</i> | Chr10      | 38420816...38422570   | Serine/Threonine protein kinase                          | <i>AT5G56760</i>    | Serine acetyltransferase 1;1                                |
| <i>Phvul.010G111000</i> | Chr10      | 38509109...38512009   | Serine/Threonine protein kinase                          | <i>AT1G64300</i>    | Protein kinase protein                                      |
| <i>Phvul.010G111900</i> | Chr10      | 38679128...38681765   | WRKY TF                                                  | <i>AT4G23810</i>    | WRKY family transcription factor                            |
| <i>Phvul.010G112400</i> | Chr10      | 38745119...38748532   | Pentatricopeptide repeat family (PPR)                    | <i>AT4G01030</i>    | Pentatricopeptide (PPR) repeat-containing protein           |
| <i>Phvul.010G113700</i> | Chr10      | 38995279...38997358   | Zinc finger C3HC4 type                                   | <i>AT2G46495</i>    | RING/U-box protein                                          |
| <i>Phvul.010G114100</i> | Chr10      | 39045743...39062551   | Pentatricopeptide repeat family (PPR)                    | <i>AT1G01320</i>    | Tetratricopeptide repeat (TPR)-like protein                 |
| <i>Phvul.010G114900</i> | Chr10      | 39188392...39189333   | Ethylene responsive TF                                   | <i>AT1G01250</i>    | Integrase-type DNA-binding protein                          |
| <i>Phvul.010G115600</i> | Chr10      | 39320406...39322691   | Zinc finger C3HC4 type                                   | <i>AT3G61850</i>    | Dof-type zinc finger DNA-binding family protein             |
| <i>Phvul.010G115800</i> | Chr10      | 39349541...39353600   | Serine/Threonine protein kinase                          | <i>AT1G49160</i>    | Protein kinase protein                                      |
| <i>Phvul.010G116300</i> | Chr10      | 39389924...39392040   | Pentatricopeptide repeat family (PPR)                    | <i>AT5G08510</i>    | Pentatricopeptide repeat (PPR-like) protein                 |
| <i>Phvul.010G117600</i> | Chr10      | 39660323...39667705   | Serine/Threonine protein kinase                          | <i>AT2G46700</i>    | CDPK-related kinase 3                                       |
| <i>Phvul.010G118300</i> | Chr10      | 39752572...39758271   | Serine/Threonine protein kinase                          | <i>AT1G01140</i>    | CBL-interacting protein kinase 9                            |
| <i>Phvul.010G119400</i> | Chr10      | 39958684...39970905   | Zinc finger C3HC4 type                                   | <i>AT4G00800</i>    | Transducin protein                                          |

## Primary leaf

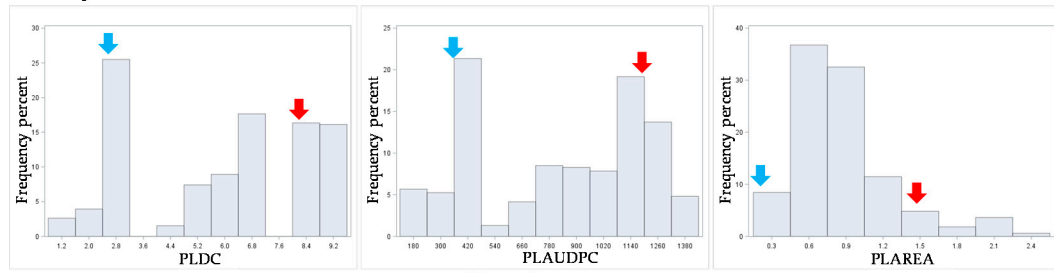

## Race 5

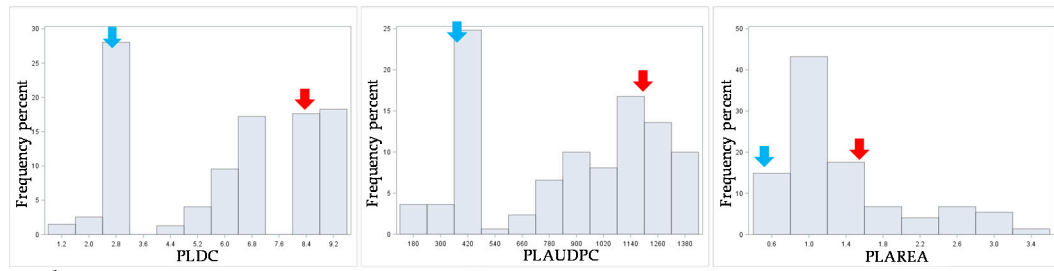

## Pod

## Race 9

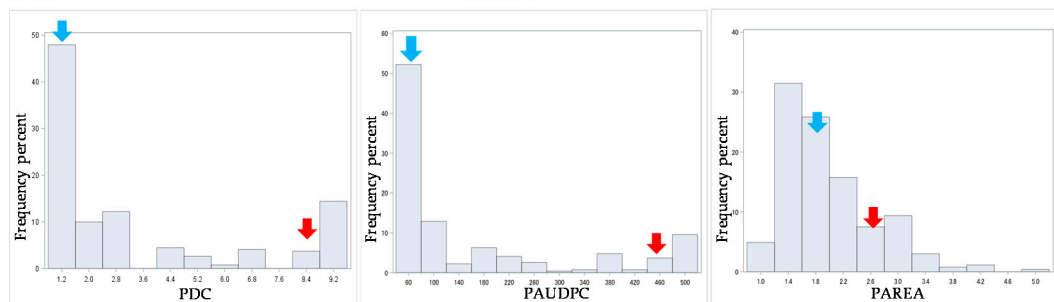

## Race 1

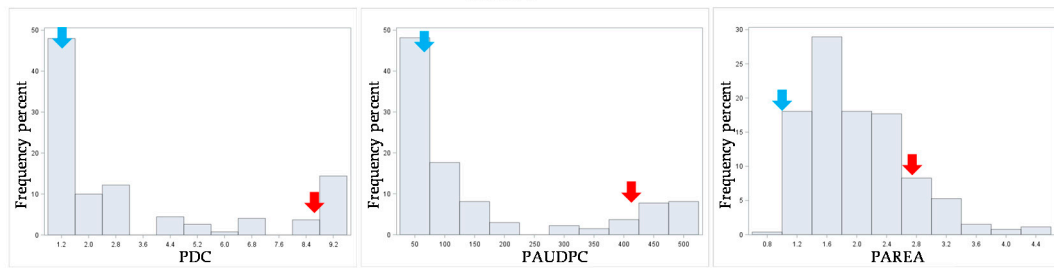

## Race 5

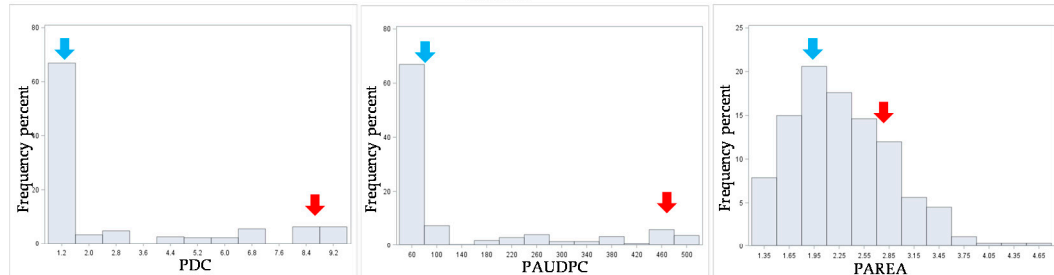

## Race 7

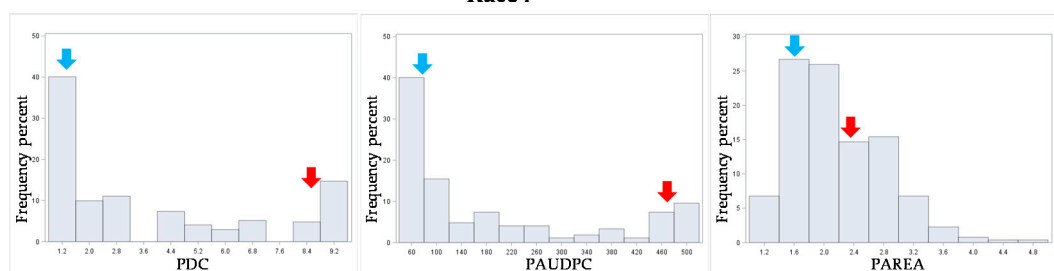

## Race 9

**Figure S1.** Frequency distribution for disease score (DC), area under the disease progress curve (AUDPC) and lesion (AREA) for primary leaf and pod resistance to halo blight races 1, 5, 7 and 9 of the F<sub>2</sub> UI3T population. Estimates of the two parents are indicated by blue (UI3) and red (Tendergreen) arrows. PDC = pod disease score; PAUDPC = pod area under the disease progress curve; PAREA = size of the lesion on pods; PLDC = primary leaf disease score; PLAUDPC = primary leaf area under the disease progress curve; PLAREA = size of the lesion on primary leaves. The two primary (unifoliate) leaves of bean plants were inoculated with races 5 and 9.

## Primary leaf

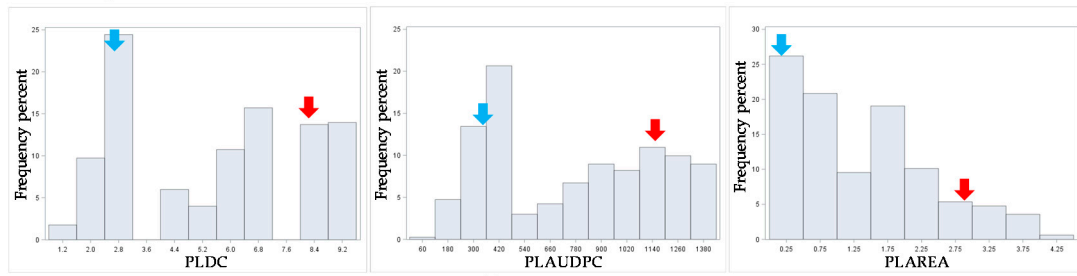

## Race 1

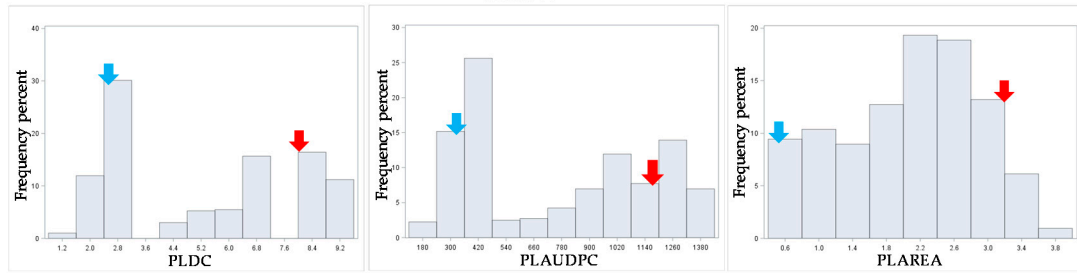

## Race 7

## Pod

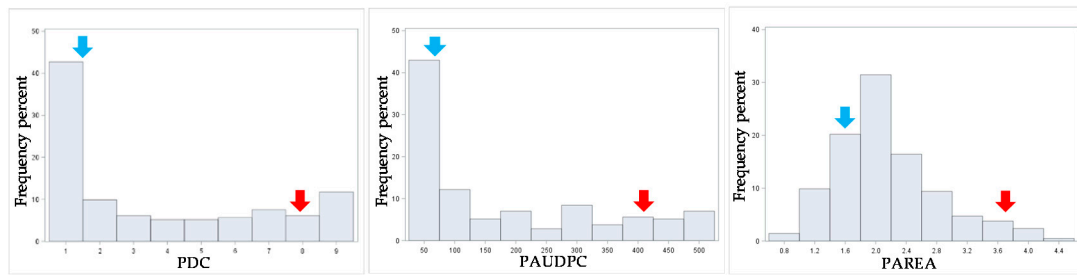

## Race 1

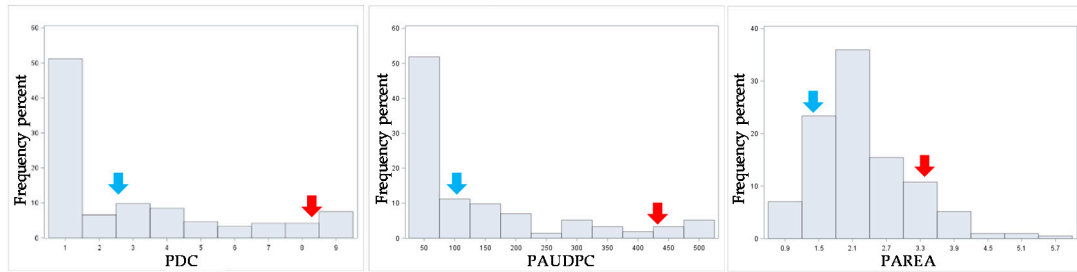

## Race 7

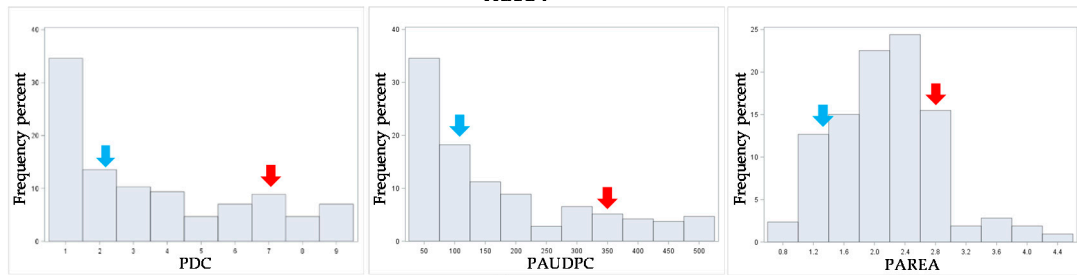

## Race 9

**Figure S2.** Frequency distribution for disease score (DC), area under the disease progress curve (AUDPC), and area lesion (AREA) in primary leaf and pod resistance to halo blight races 1, 7 and 9 of the F<sub>2</sub> UI3A52 population. Estimates of the two parents are indicated by blue (UI3) and red (A52) arrows. PDC = pod disease score; PAUDPC = pod area under the disease progress curve; PAREA = size of the lesion on pods; PLDC = primary leaf disease score; PLAUDPC = primary leaf area under the disease progress curve;

PLAREA = size of the lesion on primary leaves. The two primary (unifoliate) leaves of bean plants were inoculated with races 1 and 7.
